# Supplementary material
Source: Springer Nature journal article supplement (https://www.springermedizin.de/resource/supplementary/12995_2009_120_MOESM2_ESM.pdf/9622722)

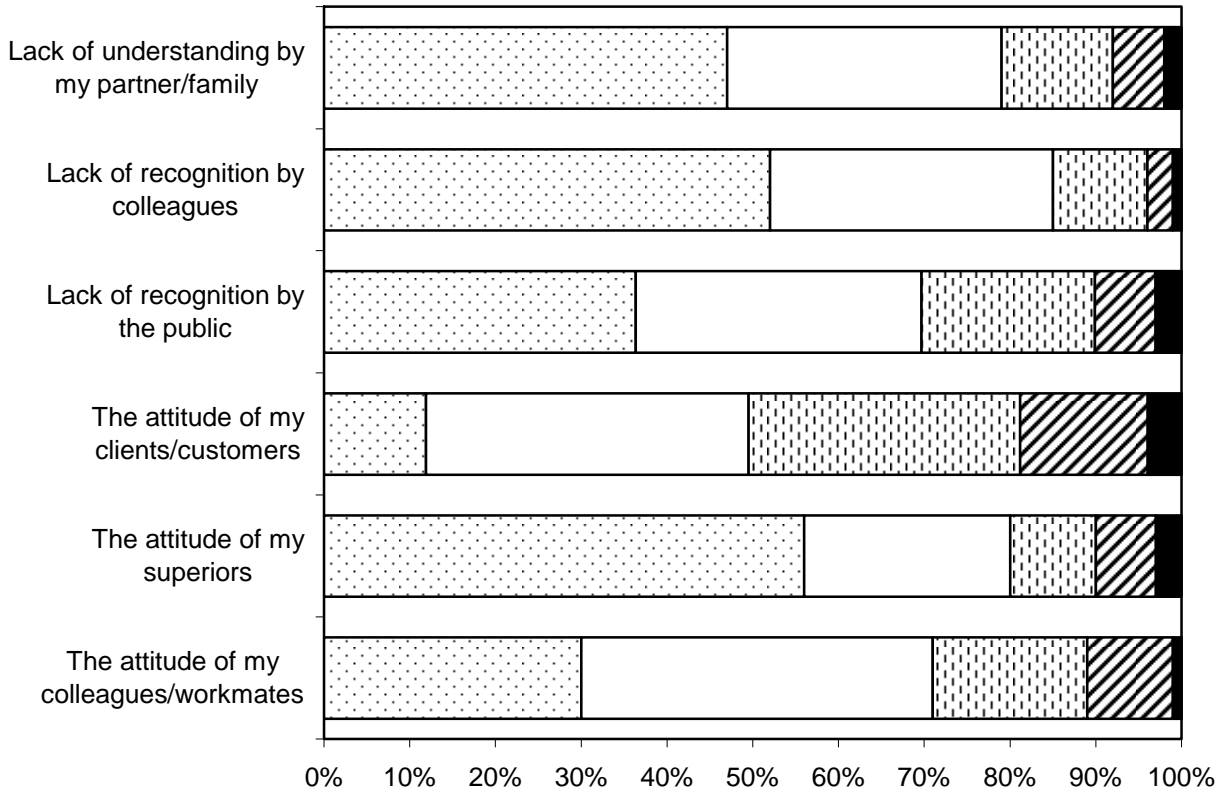

No stress    
  Mild stress    
  Moderate stress    
  Much stress    
  Extreme stress

Supplement: MOESM2 [file 9622722]
